# Supplementary material for: The Evolution of Extracellular Matrix
Source: PubMed Central journal article supplement — Mol Biol Cell. 2010 Dec 15;21(24):4300–5. doi: 10.1091/mbc.E10-03-0251 (PMC3002383; doi:10.1091/mbc.e10-03-0251), 2010-12-15
Supplement: supp_21_24_4300__1.pdf [file supp_21_24_4300__1.pdf]

**SUPPLEMENTARY DATA**

**Supplementary file 1.** Accession numbers and references for the adhesome components discussed here.

**Table S1.** Representation of ECM components and major matrix proteases in basal metazoa and protostomes.

**Table S2.** Representation of cell-matrix adhesion receptors in basal metazoa and protostomes.

**Table S3.** Major ECM innovations within deuterostomes.

## Supplementary File 1. Accession numbers for Extracellular Matrix Adhesome Components discussed in this article.

This dataset includes the accession numbers of components identified positively by BLAST searches based on mammalian and/or known protostomal protein sequences of the selected adhesome components and an e-score cutoff of 1e-20. Components on this list were verified by reverse BLAST search. Components that were identified throughout the basal metazoa and protostomes (laminin, etc) are not included on the deuterostome list. Databases searched included the Peptide, Nucleotide and expressed sequence tag divisions of GenBank, all at NCBI; Ensembl Proteins; JGI Eukaryotic Genomes; Smed DB; the elephant shark genome at <http://esharkgenome.imcb.a-star.edu.sg/>; the lamprey preliminary genome assembly at ENSEMBL; the Broad Institute Origins of Multicellularity Initiative [www.broadinstitute.org/annotation/genome/multicellularity\\_project](http://www.broadinstitute.org/annotation/genome/multicellularity_project), and the Hydra genome at <http://hydrazome.metazome.net/>. Referenced publications are cited at the end of the list.

### NON-METAZOA

#### AMOEBOZOA

***Dictyostelium discoideum*** (Eichinger et al., 2005)

Similar to integrin beta proteins A-E; the main similarities are an extracellular vWF\_A domain and talin-binding by the cytoplasmic domain), DDB0187447, DDB0187821, DDB0187822, DDB0219318, DDB0187788 (Cornillon et al., 2006, 2008)  
CD36-like, XP\_647472.1 (has c. 300aa insert in central region)

#### APUSOZOA

***Thecamonas trahens*** (formerly *Amastigomonas* sp.)

Integrin alpha (Sebé-Pedrós et al., 2010)

Integrin beta (Sebé-Pedrós et al., 2010)

### OPISTHOKONTS

#### Independent lineage within Opisthokonts

***Capsaspora owczarzaki***

Integrin alpha Co1 CAOG\_01284.1, alpha Co2 CAOG\_02006.1, alpha Co3 CAOG\_05059.1, alpha Co4 CAOG\_04087.1 (Sebé-Pedrós et al., 2010) (Broad Institute Origins of Multicellularity)  
Integrin beta Co1-3, ADI46542.1, ADI46543.1, ADI46544.1 respectively (Sebé-Pedrós et al., 2010) (Broad Institute Origins of Multicellularity)  
CD36-like CAOG\_04346 (Broad Institute Origins of Multicellularity)

#### Choanoflagellates

***Monosiga brevicollis*** (unicellular) (King et al., 2008)

Collagen IV-like, XP\_001748906 (has interspersed vWF\_A domains but no non-collagenous domains)

Collagen I-like, XP\_001749460 (no non-collagenous domains)

Three proteins with C-propeptide like domains, XP\_001744748, XP\_001747370, XP\_001744747 (all lack the cysteines needed for disulphide bonds between the chains, Exposito et al., 2008)

Fibrillin-like, XP\_001748060 (lacks TB domains)

CD36-like, XP\_001747074. (this protein model is much longer than other CD36 sequences and also contains a "HIT family domain". In view of the homology of the rest of the model to CD36 (BLASTP e-score  $1e-32$ ), the inclusion of this domain may represent a modeling artifact)

Usherin-like, XP\_001747261 (e-score of  $9e-54$  vs. *H. sapiens* usherin isoform A, but contains no FN-III domains)

### ***Salpingoeca rosetta* (unicellular and colonial)**

Fibrillar collagen-like, PTSG\_01978 (no non-collagenous domains) (Broad Institute Origins of Multicellularity)

Collagen IV-like, PTSG\_00277 (has interspersed vWF\_A domains but no non-collagenous domains) (Broad Institute Origins of Multicellularity)

Proteins with C-propeptide like domains, PTSG\_00533.1, PTSG\_00534.1 (Broad Institute Origins of Multicellularity)

Fibrillin-like, PTSG\_00996.1 (Broad Institute Origins of Multicellularity)

Usherin PTSG\_02226 (Broad Institute Origins of Multicellularity) (e-score of  $2e-132$  vs. human usherin isoform B, FN type III domains are present)

### ***Ministeria vibrans***

Integrin beta-like, AM904781\* (partial sequence; Shalchian-Tabrizi et al., 2008)

## **METAZOA**

### **Porifera**

Fibrillar collagen CAA49472, (*Ephydatia muelleri*) (Exposito et al., 1993)

BMP/tolloid-like GW173395\* (*Amphimedon queenslandica*)

Collagen IV CAA65082, CAA65083 (*Pseudocortidium jarrei*) (Boute et al., 1996)

Laminin EB741489\*, EC377287\* (LN $\alpha$ -like), EB741492\* (LN $\beta$ -like), (*Oscarella carmela*)

Perlecan EC371537\* (*Oscarella carmela*)

Fibrillin-like AM763182\*, EC375110\* (*Oscarella carmela*)

Thrombospondin AM764134\* (*Oscarella lobularis*)

Agrin EB741461\* (*Oscarella carmela*)

SPARC G840P35RA13.TO (*Oscarella carmela*)

Integrin alpha CAA65943.1 (*Geodia cydonium*) (Pancer et al., 1997)

Integrin betaPo1 AAB66911 (*Ophlitaspongia tenuis*) (Brower et al., 1997)

Syndecan AM7632658\* (*Oscarella lobularis*)

Glypican GW164369\* (*Amphimedon queenslandica*)

CD36 CAD91339 (*Suberites domuncula*) (Muller et al., 2004)

MMP EC37690\*, EC376317\* (*Oscarella carmela*)

ADAMTS EC372914\* (*Oscarella carmela*), GW175932\* (*Amphimedon queenslandica*)

### **Placozoa**

***Trichoplax adhaerens*** (Srivastava et al., 2008)

Col IV (a1)-like XP\_002116296

Col IV (a2)-like, XP\_002116198

Laminin XP\_002114273 (LN $\alpha$ -like), XP\_002111840 (LN $\beta$ -like), XP\_002109259 (LN $\gamma$ -like)

Perlecan XP\_002113826

Nidogen XP\_002113519

Fibrillin XP\_002113297

Thrombospondin XP\_002107975

Agrin XP\_002113830  
 Integrin alpha Ta1 XP\_002111197, Integrin alpha Ta2 XP\_002111224  
 Integrin beta Ta1 XP\_002110650, Integrin beta Ta2 XP\_002111182  
 Glypican XP\_002117928  
 Dystroglycan XP\_002112652  
 CD36 XP\_002112871  
 ADAMTS XP\_002108291

### **Cnidaria**

#### ***Hydra magnipapillata*** (Chapman et al., 2010)

Fibrillar collagen XP\_002161962  
 Collagen IV XP\_002157001  
 Laminin XP\_002160645 (LN $\alpha$ ), XP\_002161535 (LN $\beta$ )  
 Perlecan XP\_002168817  
 Fibrillin XP\_001630852  
 Thrombospondin XP\_002164610  
 SPARC XP\_002167014 (lacks acidic domain) (Koehler et al., 2009)  
 Integrin alpha XP\_002161020.1 (partial)  
 Integrin beta XP\_002164638.1 (partial)  
 Syndecan Hma2.224712 (Hydra genome project)  
 Glypican XP\_002157574  
 Dystroglycan XP\_002164217  
 DDR XP\_002168413  
 CD36 XP\_002169936  
 MMP XP\_002163794  
 ADAMTS XP\_002166940

#### ***Nematostella vectensis*** (starlet sea anemone) (Putnam et al., 2007)

Fibrillar collagen XP\_001635016  
 Collagen IV XP\_001626265, FC261970\*  
 Laminin XP\_001628586 (LN $\beta$ ), XP\_001621795, XP\_001623203 (LN $\gamma$ )  
 Nidogen XP\_001625225  
 Perlecan XP\_001627394  
 Fibrillin XP\_001630852  
 Thrombospondins Nv22035, Nv168100, Nv85341, Nv30790 (JGI)  
 SPARC XP\_001629356, XP\_01629356, XP\_001626442, XP\_001641541 (all lack acidic domain, Koehler et al., 2009)  
 Integrin alpha XP\_001641435 (NvItg $\alpha$ 1), (Knack et al., 2008)  
 Integrin beta XP\_001641468 (NvItg $\beta$ 1); XP\_001627336 (NvItg $\beta$ 2); XP\_001637894 (NvItg $\beta$ 3); XP\_001621822 (NvItg $\beta$ 4) (Knack et al., 2008)  
 Syndecan FC288353\*  
 Glypican XP\_001624312  
 Dystroglycan XP\_001629936  
 CD36 XP\_001626798  
 MMP XP\_001633230  
 ADAMTS XP\_00163643

**Nematode*****C. elegans*** (*C. elegans* Genome Sequencing Consortium, 1998)

Collagen IV NP\_001022662, NP\_510664

Laminin NP\_492775.2 (LN $\alpha$ ), NP\_500734.2 (LN $\beta$ ) NP\_509204.2 (LN $\gamma$ )

Perlecan NP\_497044

Nidogen NP\_506228

Fibrillin NP\_498670

SPARC NP\_500039

Agrin NP\_001022152

Integrin alpha P34446 ( $\alpha$ Pat2), NP\_499032 ( $\alpha$ Ina-1)Integrin beta NP\_497787 ( $\beta$ Pat3)

Syndecan, NP\_741894

Glypican NP\_510582

DDR NP\_508572

Dystroglycan NP\_509826

NG2/CSPG4 NP\_491802

CD36 NP\_508919

MMP NP\_497596, NP\_741156, NP\_503790

ADAMTS NP\_501792, NP\_510116, NP\_505017, NP\_741569, NP\_510291,

NP\_001024532

**Platyhelminth*****Schmidtea mediterranea*** (planarian worm) (SmedDB, Robb et al. 2008; searched vs MAKER transcripts)

Fibrillar collagen mk4.008247, mk4010742 (collagen V-like)

Laminin mk4.008300 (LN $\alpha$ -like), mk4.000288 (LN $\beta$ -like), mk4.000676 (LN $\gamma$ -like)

Perlecan DN297419\*

Fibrillin mk4.001126 (2 gene products in the model). EE669859\*, EE673994\*

SPARC DN296182\*

Agrin mk4.004859

Integrin alpha – not identified, insufficient information

Integrin beta DN315080\*, EE672330\*

Syndecan DN297550\*

CD36 mk4.000557

MMP DN314012\*

ADAMTS mk4.000736

**Protostomes****Annelid*****Capitella teleta (worm)*** (JGI Eukaryotic genomes)\$

Fibrillar collagen 224336, 18662

Collagen IV 226710, 227631

Laminin 219723, 157479 (LN $\alpha$ -like), 183991 (LN $\beta$ -like), 172041, 62597 (LN $\gamma$ -like),

Perlecan 90300

Nidogen 173985

Fibrillin 229950, 219783

Thrombospondin 172540

SPARC 160588

Agrin 71935, 223648  
 Integrin alpha 222780, 218861  
 Integrin beta 93073, 93285  
 Syndecan, EY526330\*, EY605833\*  
 Glypican 32704  
 DDR 150374, 155564  
 Dystroglycan 183589  
 NG2/CSPG4 71887  
 CD36 178424, 189109  
 MMP 164703  
 ADAMTS 141382, 158288

### **Mollusc**

***Lottia gigantea*** (JGI Eukaryotic genomes)\$  
 Fibrillar collagen 194209, 194221  
 Collagen IV 188217, 154576  
 Laminin 227981 (LN $\alpha$ ), 209765, 144813 (LN $\beta$ )  
 Perlecan 125410  
 Nidogen 208735  
 Fibrillin 232356, 218536  
 Thrombospondin 91969  
 Agrin 71215  
 SPARC 109908  
 Integrin alpha 239025, 168627, FC738676\*  
 Integrin beta 174238, 196574  
 Syndecan FC773329\*, FC736857\*  
 Glypican 139272  
 DDR 116145  
 Dystroglycan 224800  
 NG2/CSPG4 120635  
 CD36 165058, 159641  
 MMP 158923  
 ADAMTS 157969, 152088

### **Arthropods**

***Insect: Drosophila melanogaster (fruit fly)*** (Adams et al., 2000)  
 Collagen IV AAF52204, AAN10519, AAN10520  
 Laminin AAF50672 (LN $\alpha$ ), AAN10647 (LN $\beta$ )  
 Perlecan NP\_001027037  
 Nidogen NP\_610575  
 Fibrillin NP\_787974  
 Thrombospondin NP\_523495  
 SPARC NP\_651509  
 Glypican NP\_524071  
 Integrin alpha Q24247 ( $\alpha$ PS1), P12080 ( $\alpha$ PS2) O44386 ( $\alpha$ PS3) NP\_611025 ( $\alpha$ PS4),  
 NP\_611808 ( $\alpha$ PS5)  
 Integrin beta P11584 ( $\beta$ PS), Q27591 ( $\beta$ nu)  
 Syndecan NP\_476965  
 Glypican NP\_523983  
 DDR NP\_001014474

Dystroglycan NP\_523756, NP\_725523  
 NG2/CSPG4 NP\_609881  
 CD36 NP\_787957  
 MMP NP\_726473, NP\_995788  
 ADAMTS ACY56893, AA084907, NP\_001163761, NP\_788751, NP\_001163760,  
 NP\_788752

**Crustacean: *Daphnia pulex*** (JGI Eukaryotic genomes)\$ (Bauer et al., 2007)

Fibrillar collagen 188996, 226717  
 Collagen IV 226325  
 Laminin 237253, 49658 (LN $\alpha$ ), LN $\beta$ - no hits found  
 Perlecan 232498, 186952  
 Nidogen 194034  
 Fibrillin 240066  
 Thrombospondin 213032  
 Agrin 254090  
 SPARC 210519  
 Integrin alpha 60396, 197169  
 Integrin beta 211620, 202093  
 Syndecan FE368002\*  
 Glypican 20775  
 DDR 65119  
 Dystroglycan 228542  
 NG2/CSPG4 249084  
 CD36 254798  
 MMP 214039  
 ADAMTS 20190

**Deuterostomes**

**Echinoderm**

***Strongylocentrotus purpuratus* (sea urchin)** (Sea Urchin Genome Sequencing consortium et al., 2006)  
 FACIT collagen, IX-like XP\_00182505

**Hemichordate**

***Saccoglossus kowalevskii* (acorn worm)** (Baylor College of Medicine Human Genome Sequencing Center, acorn genome project)  
 FACIT collagen IX-like, XP\_002730406  
 CCN-like XP\_002731449 (predicted as a transmembrane protein)

**Chordates**

**Cephalochordate**

***Branchiostoma floridae* (Amphioxus)** (Putnam et al., 2008)  
 Tenascin, genome scaffold 155:1236900-1282536 (UCSC chrUn: 431,946,615-431,985,644) (Tenascin gene with up to 46 FN3 domains; Tucker et al., 2006, and additional analysis)  
 No fibronectin identified  
 FACIT collagen, collagen IX-like XP\_002609608  
 CCN XP\_002600149

Hyaluronan synthase XP\_002586937, XP\_02586938, XP\_002586939, XP\_002589932, XP\_002585658  
 Matrilin XM\_002593611 (mat1-like), XM\_002593611 (mat4-like)

### **Urochordate**

***Ciona intestinalis*, *Ciona savignyi* (sea squirts)** (Dehal et al., 2002, Satou et al., 2002, Vinson et al., 2005)

Tenascin, ENSCING00000003482 (*Ciona intestinalis*)

Fibronectin-like of *Ciona intestinalis* CI0100130823 (Huxley-Jones et al., 2007)

Fibronectin-like of *Ciona savignyi* SNAP00000093593 + SNAP00000093601 + SNAP00000046474 (Tucker and Chiquet-Ehrismann, 2009)

FACIT collagen, collagen IX-like NP\_001027707 (*Ciona intestinalis*, Vizzini et al., 2002)

CCN XM\_002131886, XM\_002127121, XM\_002130707 (*Ciona intestinalis*)

Matrilin XP\_002123463 (mat1-like), XP\_002123195 (mat2-like) (*Ciona intestinalis*)

### **Craniate: Hyperoartia**

***Petromyzon marinus* (lamprey)** (ENSEMBL preliminary genome assembly)

TN-C-like, partial sequences from genome, Contig44637:6129-6557, Contig58813:6704-6853

TN-R-like, partial sequences from genome, Contig31899:9943-10107, Contig65177:3656-3817

Fibronectin, insufficient information, no identification at this time

Hyaluronan synthase, partial sequences from genome, Contig30839, Contig 6935

Vitronectin, insufficient information, no identification at this time

FACIT collagen, collagen IX-like, FD725681\*

CCN insufficient information from genome, 1 EST FD727930\*

Matrilin insufficient information from genome, 1 EST FD714309.1\* (matrilin-4)

### **Craniate: Gnathostome: cartilaginous fish**

***Callorhynchus milli* (elephant shark)** (Venkatesh et al. 2007)\$

<http://esharkgenome.imcb.a-star.edu.sg/>

TN-C-like, partial sequences from genome, AAVX01052536.1, AAVX01336473, AAVX01207200

TN-R-like, partial sequences from genome, AAVX01644962, AAVX01459514.1, AAVX01001598.1, AAVX01144994.1, AAVX01251000.1, AAVX01370913.1

Fibronectin, partial sequences from genome, AAVX01073350.1, AAVX01073441.1, AAVX01173383.1

Hyaluronan synthases, partial sequences from genome. AAVX01121459 (HAS2-like), also AAVX01006632, AAVX01117413, HAS3-like AAVX01095215 (HAS3-like)

CCN – insufficient information

Vitronectin AAVX01477766 (e-score 2e-21), AAVX01097045 (e-score 5e-15)

FACIT collagen, e.g. collagen IX-like AAVX01214773

Matrilin AAVX01035295.1, AAVX01027437.1 (matrilin-4like)

Versican AAVX01149243.1

Aggrecan AAVX01409029



## **Craniate: Gnathostomes: ray-finned fish and tetrapods**

### **Bony fish**

#### ***Takifugu rubripes (marine puffer fish)*** (Aparicio et al., 2002)

Tenascin-Ca, ENSTRUT0000008995  
 Tenascin-Cb, ENSTRUT00000017437  
 Tenascin-R, ENSTRUT00000008977  
 Tenascin-X, ENSTRUT00000041256  
 Tenascin-W, ENSTRUT00000006069  
 Fibronectin 1, ENSTRUT00000003179  
 Fibronectin 1b, ENSTRUT00000044055  
 CCN ENSTRUT00000034720, ENSTRUT00000025553, ENSTRUT00000047434  
 Hyaluronan synthase JGI Protein ID 709251 [scaffold 22:1935751-1937741](#) (HAS1),  
 JGI Protein ID 571120 [scaffold 133:635916-639428](#) (HAS2), JGI Protein ID 592658  
[scaffold 2739:9368-11891](#) (HAS3)  
 CD44 JGI Protein ID 120971 [scaffold 279:248145-254658](#)  
 Vitronectin JGI Protein ID 728631 [scaffold 71:917923-920251](#) (vitronectin a), JGI  
 Protein ID 594143 [scaffold 9:2460537-2462775](#)(vitronectin b)  
 FACIT collagen e.g., collagen IX. JGI Protein ID 139763 [scaffold 24:1632310-1642513](#)  
 (alpha-1 IX), JGI Protein ID 149937 [scaffold 257:124147-131000](#) (alpha-3 IX)  
 Matrilin JGI Protein ID 576258 [scaffold 45:911050-913637](#) (matrilin-1), JGI Protein ID  
 744708 [scaffold 2179:10548-18098](#) (matrilin-2), JGI Protein ID 730629  
[scaffold 94:779373-784718](#) (matrilin-3a), JGI Protein ID 724156 [scaffold 34:476474-498040](#)  
 (matrilin-3b), JGI Protein ID 744708 [scaffold 2179:10548-18098](#) (matrilin-4)  
 Aggrecan JGI Protein ID 579364 [scaffold 1:641058-660360](#) (aggrecan a), JGI Protein  
 ID 731418 [scaffold 104:327667-334279](#) (aggrecan b)  
 Versican Protein ID (JGI) 723209 [scaffold 27:937450-958030](#) (versican b)

#### ***Tetraodon nigriviridis (freshwater green-spotted pufferfish)*** (Jaillon et al., 2004)

Tenascin-Ca, CAG01316  
 Tenascin-Cb, CAG05242  
 Tenascin-R, CAG07653  
 Tenascin-X, GSTENT00034161001  
 Tenascin-W, CAG07652  
 Fibronectin 1, GSTENT10013160001, GSTENT10013159001, GSTENT10013158001  
 GSTENT10017308001, GSTENT10017309001, GSTENT10017310001  
 Fibronectin 1b, GSTENT10017311001  
 CCN CAG01808, ENSTNIT00000021487, ENSTNIT00000012697  
 Hyaluronan synthase GSTENT10019574001 (HAS1), GSTENT10019361001 (HAS2)  
 GSTENT10029049001 (HAS3)  
 CD44 GSTENT10005623001  
 Vitronectin ENSTNIT00000019453 (vitronectin a), ENSTNIT00000008425 (vitronectin b)  
 FACIT collagen e.g., collagen IX. ENSTNIT00000019915 (alpha-1 IX),  
 ENSTNIT00000015781 (alpha-3 IX)  
 Matrilin GSTENT10013768001 (matrilin-1), GSTENT10004112001 (matrilin-2 partial),  
 GSTENT10004111001 (matrilin-2 partial), GSTENT10006657001 (matrilin-3a),  
 ENSTNIT00000000599 (matrilin-3b), ENSTNIT00000008057 (matrilin-4)  
 Aggrecan GSTENT10017592001 (aggrecan a, partial), GSTENT10017593001  
 (aggrecan a, partial), GSTENT10017594001 (aggrecan a, partial),  
 GSTENT10006265001 (aggrecan b, partial), GSTENT10006264001 (aggrecan b,  
 partial)

Versican GSTENT10016256001 (versican a), GSTENT10004225001 (versican b, partial), GSTENT10004231001 (versican b, partial)

***Danio rerio (zebrafish)*** (The Zebrafish genome sequencing project group at the Wellcome Trust Sanger Institute [www.sanger.ac.uk/Projects/D\\_rerio/](http://www.sanger.ac.uk/Projects/D_rerio/))

Tenascin-C, DQ096731 (Schweitzer et al., 2005)

Tenascin-R, XP\_002660896

Tenascin-X, XP\_002665649

Tenascin-W, NP\_571111

Fibronectin 1, NP\_571595

Fibronectin 1b, AY725818 (Sun et al., 2005)

CCN zCyr61-c5: paralog of mammalian Cyr61 on zebrafish chromosome 5, GQ273493;

zCyr61-c8: paralog of mammalian Cyr61 on zebrafish chromosome 8, GQ273499; zCyr61-

c23: paralog of mammalian Cyr61 on zebrafish chromosome 23, NM\_001001826;

zCTGF-c19: paralog of mammalian CTGF on zebrafish chromosome 19, GQ920789;

zCTGF-c20: paralog of mammalian CTGF on zebrafish chromosome 20, NM\_001015041;

zWISP1-c16: paralog of mammalian WISP1 on zebrafish chromosome 16, GQ273496;

zWISP1-c19: paralog of mammalian WISP1 on zebrafish chromosome 19, GQ273497;

zWISP2-c23: paralog of mammalian WISP2 on zebrafish chromosome 23, GQ273495;

zWISP3-c20: paralog of mammalian WISP3 on zebrafish chromosome 20, GQ273498.

Hyaluronan synthase NP\_001157502 (HAS1), NP\_705936 (HAS2), NP\_775327 (HAS3)

CD44 XP\_002667016

Vitronectin NP\_001018508 (vitronectin a), NP\_001132933 (vitronectin b)

FACIT collagen e.g. collagen IX. NP\_998429 (alpha-1 IX), XP\_695491 (alpha-3 IX)

Matrilin NP\_001093210 (matrilin-1), NP\_998714 (matrilin-2), NP\_001004007 (matrilin-

3a), NP\_001012385 (matrilin-3b), CAG27565 (matrilin-4)

Aggrecan XP\_686182 (aggrecan a), ENSDART00000046249 (aggrecan b), [BM812126\\*](#)

(aggrecan b)

Versican XP\_002662132 (versican a), NP\_999853 (versican b)

### **Tetrapods**

***Xenopus tropicalis/Xenopus laevis (toads)*** (Hallsten et al., 2010)

Tenascin-C, ENSXETT00000051641, ENSXETT00000051644

Tenascin-R, NP\_001107287

Tenascin-X, ENSXETT00000011268

Tenascin-W, ENSXETT00000043349

Fibronectin, AAH72841

CCN CTGF (AAH94492), Wisp-2 (AAH87808), Nov (NP\_001079127), Cyr61

(NP\_001079908)

Hyaluronan synthase NP\_001120590 (HAS1), NP\_001120557 (HAS2), AAP58398

(HAS3)

CD44 NP\_988948

Vitronectin ACI29973 (from *X. laevis*)

FACIT collagen e.g. collagen IX. NP\_001086796 (alpha-1 IX; from *X. laevis*),

NP\_001090661 (alpha-2 IX), NP\_001120497 (alpha-3 IX)

Matrilin NP\_001025613 (matrilin-1), AAH63920 (matrilin-2), XP\_002938060

(matrilin-4; from *X. laevis*)

Aggrecan XP\_002932297

Versican NP\_001104185 (from *X.laevis*)

***Gallus gallus (chicken)*** (International Chicken Genome Sequencing Consortium, 2004)

Tenascin-C, AAA49086  
 Tenascin-R, NP\_990607  
 Tenascin-X, CAA67509  
 Tenascin-W, CAJ77765  
 Fibronectin, XP\_421868  
 CCN CTGF (NP\_989605), Wisp-1 (AAY21159), Nov (CAA41975), Cyr-61 (NP\_001026734)  
 Hyaluronan synthase NP\_990137 (HAS2), XP\_425137 (HAS3)  
 CD44 NP\_990191  
 Vitronectin NP\_990392  
 FACIT collagen e.g., collagen IX. NP\_001094381 (alpha-1 IX), XP\_001233987 (alpha-2 IX), NP\_990636 (alpha-3 IX)  
 Matrilin NP\_001025546 (matrilin-1), XP\_424219 (matrilin-2), NP\_990403 (matrilin-3), XP\_425698 (matrilin-4)  
 Aggrecan XP\_001232950  
 Versican NP\_990118

***Mus musculus (mouse)*** (Mouse Genome Sequencing Consortium et al., 2002)

Tenascin-C, NP\_035737  
 Tenascin-R, AAI38044  
 Tenascin-X, BAA24436  
 Tenascin-W, AAI38336  
 Fibronectin, NP\_034363  
 Hyaluronan synthase NP\_032241 (HAS1), NP\_032242 (HAS2), NP\_032243 (HAS3)  
 CD44 NP\_033981(isoform a)  
 Vitronectin AAA40558  
 FACIT collagen e.g., collagen IX. NP\_031766 (alpha-1 IX), NP\_031767 (alpha-2 IX), NP\_034066 (alpha-3 IX)  
 Matrilin AAH47140 (matrilin-1), AAH92298 (matrilin-2), AAH71224 (matrilin-3), AAH36558 (matrilin-4)  
 CCN CTGF (AAD18058), Wisp-1 (NP\_061353), Wisp-2 (NP\_058569), Nov (NP\_058569), Cyr61 (NP\_034646), Wisp-3 (NP\_001120848)  
 Aggrecan AAC37670  
 Versican NP\_001074718 (versican isoform 1)

***Homo sapiens*** (Venter et al., 2001)

Tenascin-C, CAA55309  
 Tenascin-R, NP\_003276  
 Tenascin-X, NP\_061978  
 Tenascin-W, NP\_071376  
 Fibronectin, NP\_997641  
 Hyaluronan synthase NP\_001514 (HAS1), NP\_005319 (HAS2), NP\_619515 (HAS3)  
 CD44 ACI46596  
 Vitronectin AAH05046.1  
 FACIT collagen e.g., collagen IX, NP\_001842 (alpha-1 IX), NP\_001843 (alpha-2 IX), NP\_001844 (alpha-3 IX)  
 Matrilin CAI19322 (Matrilin-1), EAW91764 (Matrilin-2), AAI39908 (Matrilin-3), CAB46380 (Matrilin-4)  
 Aggrecan AAH36445

Versican NP\_004376.2 (Variant 1), NP\_001119808.1 (Variant 2), NP\_001157569.1 (Variant 3), NP\_001157570.1 (Variant 4)  
 CCN Wisp-1 (NP\_003873), Wisp-2 (NP\_543028), Wisp-3 (NP\_937882), CTGF (NP\_001892), Nov (NP\_002505), Cyr61 (NP\_001545)

### **KEY**

\*Sequence is from an expressed sequence tag

\$JGI genomes were searched against the model transcripts; only the top verified transcript hits from JGI or the elephant shark genome sequence project are included on the list.

### **REFERENCES**

Adams JC et al. (2003) Characterisation of Drosophila thrombospondin defines an early origin of pentameric thrombospondins. *J Mol Biol* 328: 479-494.

Adams MD et al. (2000) The genome sequence of Drosophila melanogaster. *Science* 287: 2185-95.

Aparicio S et al., (2002) Whole-genome shotgun assembly and analysis of the genome of Fugu rubripes. *Science* 297: 1301-1310.

Bauer DJ. (2007) The Daphnia Genomics Consortium Meeting: the genome biology of the model crustacean Daphnia. *Expert Rev. Proteomics* 4: 601-602.

Bentley AA, Adams JC (2010) The evolution of thrombospondins and their ligand-binding activities. *Mol Biol. Evol.* 27: 2187-97.

Boute N, Exposito JY, Boury-Esnault N, Vacelet J, Noro N, Miyazaki K, Yoshizato K and Garrone R. (1996) Type IV collagen in sponges, the missing link in basement membrane ubiquity *Biol. Cell* 88: 37-44.

Brower DL, Brower SM, Hayward DC, Ball EE. (1997) Molecular evolution of integrins: genes encoding integrin beta subunits from a coral and a sponge. *Proc Natl Acad Sci U S A.* 94: 9182-7.

*C. elegans* Sequencing Consortium. (1998) Genome sequence of the nematode *C. elegans*: a platform for investigating biology. *Science* 282: 2012-2018.

Chakravarti, R. and Adams, J.C. (2006) Comparative genomics of the syndecans defines an ancestral genomic context associated with matrilins in vertebrates. *BMC Genomics* 7: 83.

Chapman JA et al. (2010) The dynamic genome of Hydra. *Nature* 464: 592-96.

Cornillon S, Gebbie L, Benghezal M, Nair P, Keller S, Wehrle-Haller B, Charette SJ, Brückert F, Letourneur F, Cosson P. (2006) An adhesion molecule in free-living Dictyostelium amoebae with integrin beta features. *EMBO Rep.* 7: 617-21.

Cornillon S, Froquet R, Cosson P. (2008) Involvement of Sib proteins in the regulation of cellular adhesion in Dictyostelium discoideum. *Eukaryot Cell* 7: 1600-5.

Dehal P, et al. (2002) The draft genome of *Ciona intestinalis*: insights into chordate and vertebrate origins. *Science* 298: 2157-2167.

Eichinger L, et al. (2005) The genome of the social amoeba *Dictyostelium discoideum*. *Nature* 435: 43-57.

Exposito JY, van der Rest M, Garrone R (1993) The complete intron/exon structure of *Ephydatia mulleri* fibrillar collagen gene suggests a mechanism for the evolution of an ancestral gene module. *J. Mol. Evol.* 37: 254-259.

Exposito JY, et al. (2008) Demosponge and sea anemone fibrillar collagen diversity reveals the early emergence of A/C clades and the maintenance of the modular structure of type V/XI collagens from sponge to human. *J. Biol. Chem.* 283: 28226-28235.

Fanjul-Fernández M, Folgueras AR, Cabrera S, López-Otín C. (2010) Matrix metalloproteinases: evolution, gene regulation and functional analysis in mouse models. *Biochim Biophys Acta* 1803:3-19.

Hellsten U, et al. (2010) The genome of the Western clawed frog *Xenopus tropicalis*. *Science* 328: 633-36.

Huhtala M, Heino J, Casciari D, de Luise A, Johnson MS. (2005) Integrin evolution: insights from ascidian and teleost fish genomes. *Matrix Biol.* 24:83-95.

Hutter H, Vogel BE, Plenefisch JD, Norris CR, Proenca RB, Spieth J, Guo C, Mastwal S, Zhu X, Scheel J, Hedgecock EM. (2000) Conservation and novelty in the evolution of cell adhesion and extracellular matrix genes. *Science* 287: 989-94.

Huxley-Jones J, Robertson DL, Boot-Handford RP. (2007) On the origins of the extracellular matrix in vertebrates. *Matrix Biol.* 26: 2-11.

Hynes RO, Zhao Q. (2000) The evolution of cell adhesion. *J. Cell Biol.* 150: F89–F96.

International Chicken Genome Sequencing Consortium. (2004) Sequence and comparative analysis of the chicken genome provide unique perspectives on vertebrate evolution. *Nature* 432: 695-716.

Jaillon O et al. (2004) Genome duplication in the teleost fish *Tetraodon nigroviridis* reveals the early vertebrate proto-karyotype. *Nature* 431: 946-957.

King N et al. (2008) The genome of the choanoflagellate *Monosiga brevicollis* and the origin of metazoa. *Nature* 451: 783-788.

Knack BA, Iguchi A, Shinzato C, Hayward DC, Ball EE, Miller DJ. (2008) Unexpected diversity of cnidarian integrins: expression during coral gastrulation. *BMC Evol Biol* 8:136.

- Koehler A, Desser S, Chang B, MacDonald J, Tepass U & Ringuette M. (2009) Molecular evolution of SPARC: absence of the acidic module and expression in the endoderm of the starlet sea anemone, *Nematostella vectensis*. *Dev. Genes Evol.* 219: 509-521.
- Mouse Genome Sequencing Consortium et al. (2002) Initial sequencing and comparative analysis of the mouse genome. *Nature* 420: 520-62.
- Mueller WEG, Thakur NL, Ushijima H, Thakur AN, Krasko A, Le Pennec G, Indap, MM, Perovic-Ottstadt S, Schroeder HC, Lang G, Bringmann G. (2004) Matrix-mediated canal formation in primmorphs from the sponge *Suberites domuncula* involves the expression of a CD36 receptor-ligand system. *J. Cell. Sci.* 117: 2579-2590.
- Pancer Z, Kruse M, Müller I, Müller WE. (1997) On the origin of Metazoan adhesion receptors: cloning of integrin alpha subunit from the sponge *Geodia cydonium*. *Mol Biol Evol.* 14: 391-8.
- Putnam NH, et al. (2007) Sea anemone genome reveals ancestral eumetazoan gene repertoire and genomic organization. *Science* 317: 86-94.
- Putnam NH, et al. (2008) The amphioxus genome and the evolution of the chordate karyotype. *Nature* 453: 1064-1071.
- Robb SM, Ross E, Sánchez Alvarado A. (2008) SmedGD: the *Schmidtea mediterranea* genome database. *Nucleic Acids Res* 36: D599-606.
- Satou Y, et al. (2002) A cDNA resource from the basal chordate *Ciona intestinalis*. *Genesis* 33: 153-154.
- Schweitzer J, Becker T, Lefebvre J, Granato M, Schachner M, Becker CG. (2005) Tenascin-C is involved in motor axon outgrowth in the trunk of developing zebrafish. *Dev Dyn.* 234: 550-66.
- Sea Urchin Genome Sequencing Consortium, et al. (2006) The genome of the sea urchin *Strongylocentrotus purpuratus*. *Science* 314: 941-952.
- Sebé-Pedrós A, Roger AJ, Lang FB, King N, Ruiz-Trillo I. (2010) Ancient origin of the integrin-mediated adhesion and signaling machinery. *Proc Natl Acad Sci U S A.* 107: 10142-7.
- Shalchian-Tabrizi K, Minge MA, Espelund M, Orr R, Ruden T, Jakobsen KS, Cavalier-Smith T. (2008) Multigene phylogeny of choanozoa and the origin of animals. *PLoS One* 3: e2098.
- Srivastava M, et al. (2008) The *Trichoplax* genome and the nature of placozoans. *Nature* 454: 955-960.
- Sun L, Zou Z, Collodi P, Xu F, Xu X, Zhao Q. (2005) Identification and characterization of a second fibronectin gene in zebrafish. *Matrix Biol.* 24: 69-77.

Tucker RP, Hess J, Drabikowski K, Ferralli J, Chiquet-Ehrismann R, Adams JC. (2006) Phylogenetic analysis of the tenascin gene family: evidence of origin early in the chordate lineage. *BMC Evolutionary Biology* 6: 60.

Tucker RP, Chiquet-Ehrismann R. (2009a) Evidence for the evolution of tenascin and fibronectin early in the chordate lineage. *Int. J. Biochem. Cell Biol.* 41: 424-434.

Venkatesh B, et al. (2007) Survey sequencing and comparative analysis of the elephant shark (*Callorhynchus milii*) genome. *PLoS Biol* 5: e101.

Venter CJ et al. (2001) The sequence of the human genome. *Science* 291: 1304-1351.

Vinson JP, Jaffe DB, O'Neill K, Karlsson EK, Stange-Thomann N, S, Mesirov JP, Satoh N, Satou Y, Nusbaum C, Birren B, Galagan JE, Lander ES (2005) Assembly of polymorphic genomes: Algorithms and application to *Ciona savignyi* *Genome Res.* 15: 1127-1135.

Vizzini A, Arizza V, Cervello M, Cammarata M, Gambino R and Parrinello N. (2002) Cloning and expression of a type IX-like collagen in tissues of the ascidian *Ciona intestinalis*. *Biochim. Biophys. Acta* 1577: 38-44.

Wagener R, Ehlen HW, Ko YP, Kobbe B, Mann HH, Sengle G, Paulsson M. (2005) The matrilins--adaptor proteins in the extracellular matrix. *FEBS Lett.* 579: 3323-29.

Weigel PH, DeAngelis PL. (2007) Hyaluronan synthases: a decade-plus of novel glycosyltransferases. *J Biol Chem.* 282: 36777-81.

Whittaker CA, Bergeron KF, Whittle J, Brandhorst BP, Burke RD, Hynes RO. (2006) The echinoderm adhesome. *Dev. Biol.* 300: 252-266.

| Taxonomy/Species                              | Fibrillar collagen | Collagen IV        | Laminin | Perlecan | Nidogen | Fibrillin | Thrombospondin | Aggrin | SPARC | MMP | ADAMTS |
|-----------------------------------------------|--------------------|--------------------|---------|----------|---------|-----------|----------------|--------|-------|-----|--------|
| Porifera: <i>several species</i>              | +                  | +(Homosclera only) | +       | +        | #       | +         | +              | +      | +     | +   | +      |
| Placozoa: <i>Trichoplax adhaerens</i>         | -                  | +                  | +       | +        | +       | +         | +              | +      | -     | -   | +      |
| Cnidaria: <i>Nematostella vectensis</i>       | +                  | +                  | +       | +        | +       | +         | +              | -      | +     | +   | +      |
| <i>Hydra magnipapillata</i>                   | +                  | +                  | +       | +        | -       | +         | +              | -      | +     | +   | +      |
| Platyhelminth: <i>Schmidtea mediterranea</i>  | +                  | #                  | +       | +        | -       | +         | -              | +      | +     | +   | +      |
| Nematode: <i>Caenorhabditis elegans</i>       | -                  | +                  | +       | +        | +       | +         | -              | +      | +     | +   | +      |
| Annelid: <i>Capitella teleta</i>              | +                  | +                  | +       | +        | +       | +         | +              | +      | +     | +   | +      |
| Mollusc: <i>Lottia gigantea</i>               | +                  | +                  | +       | +        | +       | +         | +              | +      | +     | +   | +      |
| Arthropods: <i>Daphnia pulex</i> (crustacean) | +                  | +                  | +       | +        | +       | +         | +              | +      | +     | +   | +      |
| <i>Drosophila melanogaster</i> (insect)       | -                  | +                  | +       | +        | +       | +         | +              | -      | +     | +   | +      |

**Table S1.** Representation of ECM components and major ECM protease categories in basal metazoa and protostomes. Based on current sequenced genomes, EST datasets, cDNA sequences and data from Boute et al., 1996, Hynes and Zhao 2000, Hutter et al., 2001, Adams et al., 2003, Exposito et al., 2008, Fanjul-Fernández et al., 2009, Koehler et al., 2009, Bentley and Adams, 2010. All references are in Supp. File 1. #Insufficient information from genome or ESTs.



| Taxonomy/Species                                 | Integrin<br>$\alpha$ | Integrin<br>$\beta$ | CD36 | Syndecan | Glypican | DDR | Dystro-<br>glycan | NG2/<br>CSPG4 |
|--------------------------------------------------|----------------------|---------------------|------|----------|----------|-----|-------------------|---------------|
| Porifera: several species                        | +                    | +                   | +    | +        | +        | -   | -                 | -             |
| Placozoa: <i>Trichoplax<br/>adhaerens</i>        | +                    | +                   | +    | -#       | +        | -*  | +                 | -             |
| Cnidaria: <i>Nematostella<br/>vectensis</i>      | +                    | +                   | +    | +        | +        | -*  | +                 | -             |
| <i>Hydra magnipapillata</i>                      | +                    | +                   | +    | +        | +        | +   | +                 | -             |
| Platyhelminth: <i>Schmidtea<br/>mediterranea</i> | -#                   | +                   | +    | +        | -        | -   | -                 | -             |
| Nematode: <i>Caenorhabditis<br/>elegans</i>      | +                    | +                   | +    | +        | +        | +   | +                 | +             |
| Annelid: <i>Capitella teleta</i>                 | +                    | +                   | +    | +        | +        | +   | +                 | +             |
| Mollusc: <i>Lottia gigantea</i>                  | +                    | +                   | +    | +        | +        | +   | +                 | +             |
| Arthropods: <i>Daphnia pulex</i><br>(crustacean) | +                    | +                   | +    | +        | +        | +   | +                 | +             |
| <i>Drosophila melanogaster</i><br>(insect)       | +                    | +                   | +    | +        | +        | +   | +                 | +             |

**Table S2.** Representation of ECM adhesion receptors in basal metazoa and protostomes.

Based on current sequenced genomes, EST datasets, cDNA sequences and data from Brower et al., 1997, Pancer et al., 1997, Hynes and Zhao, 2000, Hutter et al., 2001, Hutala et al., 2005, Chakravarti and Adams, 2006, Exposito et al., 2008, Chapman et al., 2010. All references are in Supp. file 1. DDR = discoidin domain receptor. \*A DDR-like discoidin domain and receptor tyrosine kinase domain are encoded by separate predicted proteins, XP\_002109287 and XP\_002109288, respectively (*T. adhaerens*) and XP\_001629823 and XP\_001637553 (*N. vectensis*). #Insufficient information from genome or ESTs.

| Taxonomy/Species/common name                                                   | FACIT collagen | CCN | Matrilin | Tenascin | Fibronectin | Hyaluronan synthase | Vitronectin | Versican | Aggrecan |
|--------------------------------------------------------------------------------|----------------|-----|----------|----------|-------------|---------------------|-------------|----------|----------|
| Echinoderm: <i>Strongylocentrotus purpuratus</i> (sea urchin)                  | +              | -   | -        | -        | -           | -                   | -           | -        | -        |
| Hemichordate: <i>Saccoglossus kowalevskii</i> (acorn worm)                     | +              | +   | -        | -        | -           | -                   | -           | -        | -        |
| Urochordate: <i>Ciona intestinalis</i> (sea squirt)                            | +              | +   | +        | +        | FN-like     | -                   | -           | -        | -        |
| Cephalochordate: <i>Branchiostoma floridae</i> (Amphioxus)                     | +              | +   | +        | +        | -           | +                   | -           | -        | -        |
| Craniate: <i>Petromyzon marinus</i> (lamprey)                                  | +#             | -#  | +#       | +        | -#          | +                   | -#          | -        | -#       |
| Craniate, Gnathostome: <i>Callorhynchus milii</i> (elephant shark)             | +              | -#  | +        | +        | +           | +                   | +           | +        | +        |
| Craniate, Gnathostome, ray-finned fish: <i>Takifugu rubripes</i> (puffer fish) | +              | +   | +@       | +*       | +           | +                   | +           | +        | +        |
| <i>Tetraodon nigriviridis</i> (freshwater puffer)                              | +              | +   | +@       | +*       | +^          | +                   | +           | +        | +        |
| <i>Danio rerio</i> (zebrafish)                                                 | +              | +   | +@       | +        | +^          | +                   | +           | +        | +        |
| Craniate, Gnathostome, tetrapods: <i>Xenopus tropicalis</i> (toad)             | +              | +   | +        | +        | +           | +                   | +           | +        | +        |
| <i>Gallus gallus</i> (chicken)                                                 | +              | +   | +        | +        | +           | +                   | +           | +        | +        |
| <i>Mus musculus</i> (mouse)                                                    | +              | +   | +        | +        | +           | +                   | +           | +        | +        |
| <i>Homo sapiens</i> (human)                                                    | +              | +   | +        | +        | +           | +                   | +           | +        | +        |

**Table S3.** Major ECM innovations in Deuterostomes.

Based on current sequenced genomes, EST datasets, cDNA sequences and data from Schweitzer et al., 2005, Sun et al., 2005, Wagener et al., 2005, Chakravarti and Adams, 2006, Whittaker et al., 2006, Tucker et al., 2006, Huxley-Jones et al., 2007, Weigel et al., 2007, Tucker and Chiquet-Ehrismann et al., 2009. All references are listed in Supp. File 1.

\*has two TN-C paralogues, ^ has two FN paralogues, @ has two matrilin-3 paralogues. #Insufficient information from genome.
